# Supplementary material for: Structure of the Newcastle Disease Virus L protein in complex with tetrameric phosphoprotein
Source: PubMed Central journal article supplement (PMC10006412; doi:10.1038/s41467-023-37012-y), 2023-03-10
Supplement: 41467_2023_37012_MOESM1_ESM.pdf [file 41467_2023_37012_MOESM1_ESM.pdf]

## **Supplementary information**

**Structure of the Newcastle Disease Virus L protein in  
complex with tetrameric phosphoprotein**

**J. Cong *et al.***

a

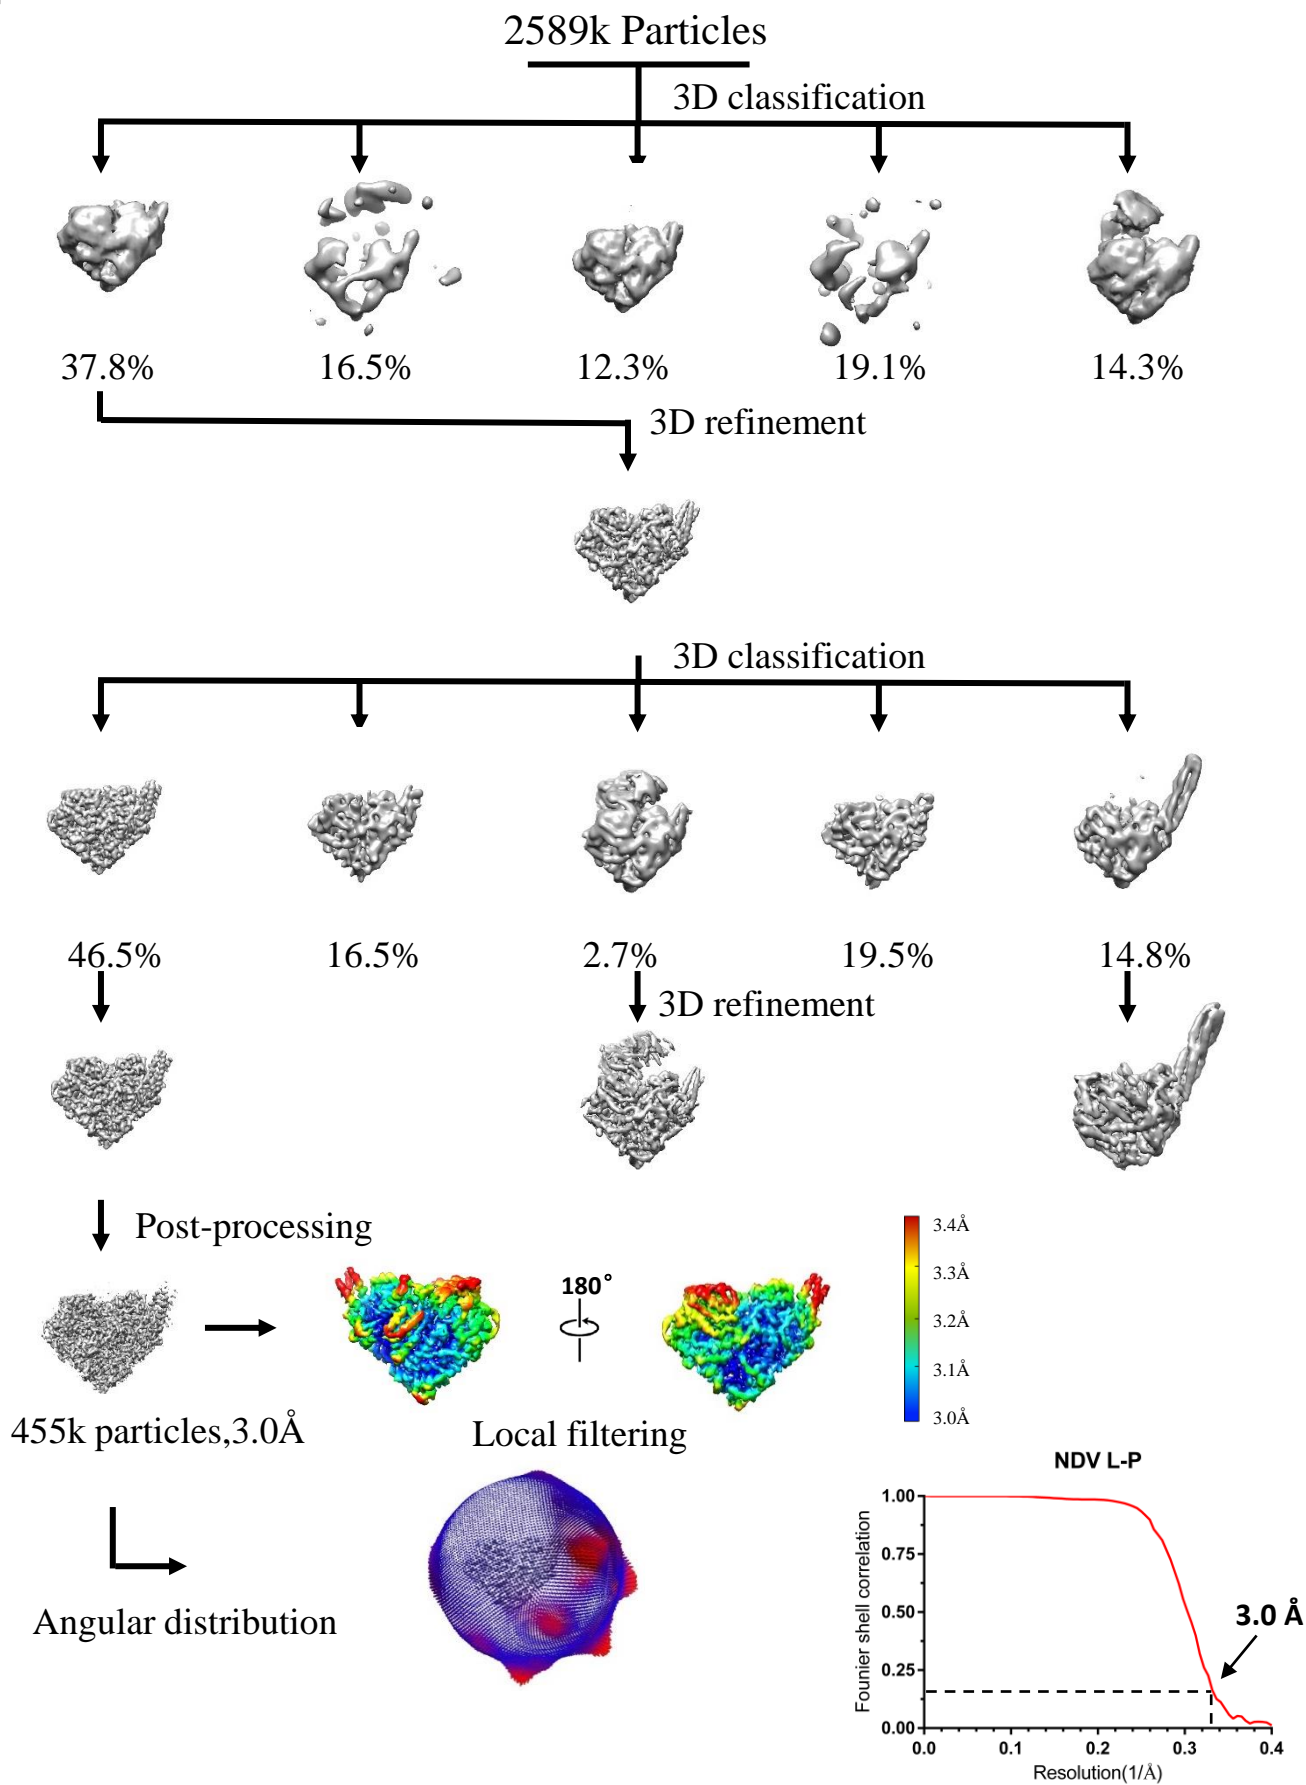

b

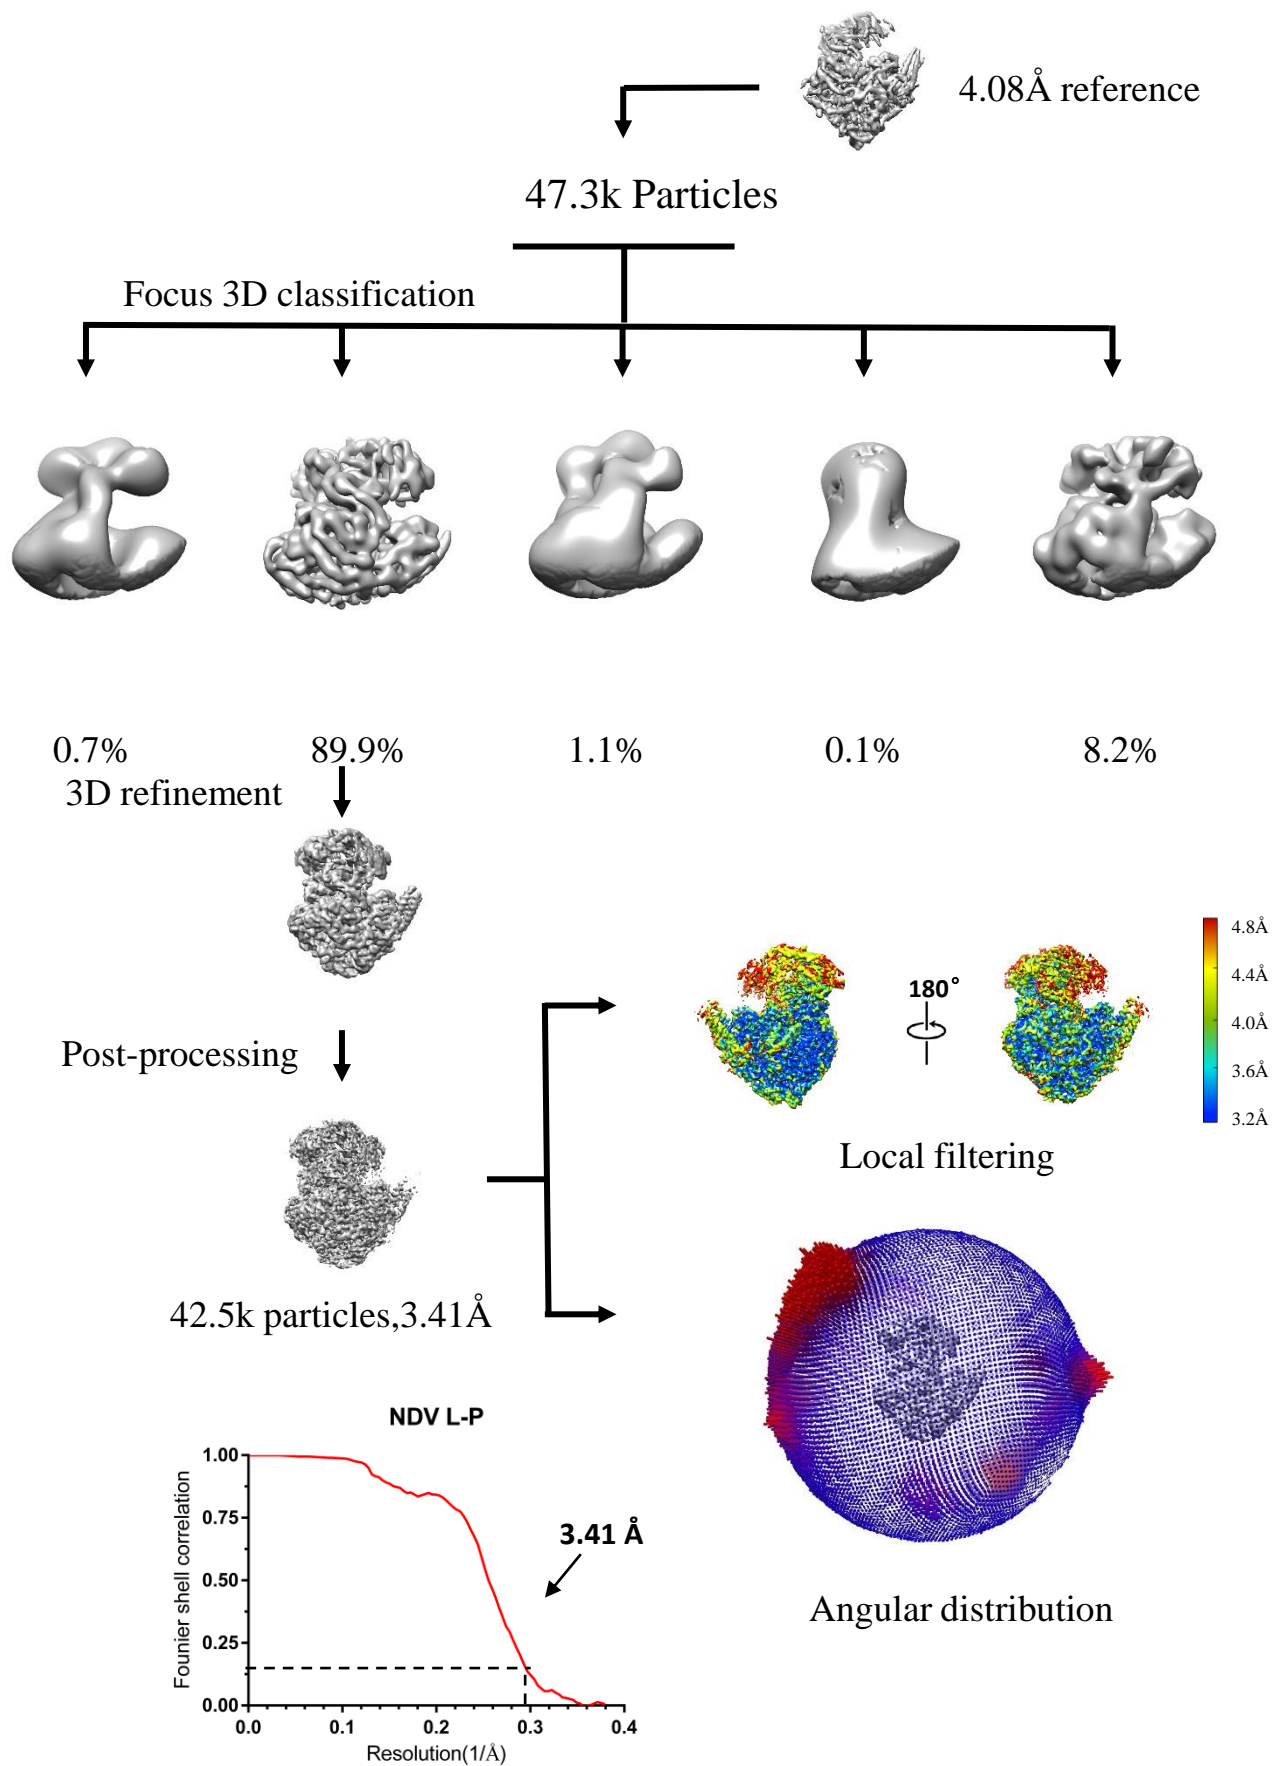

C

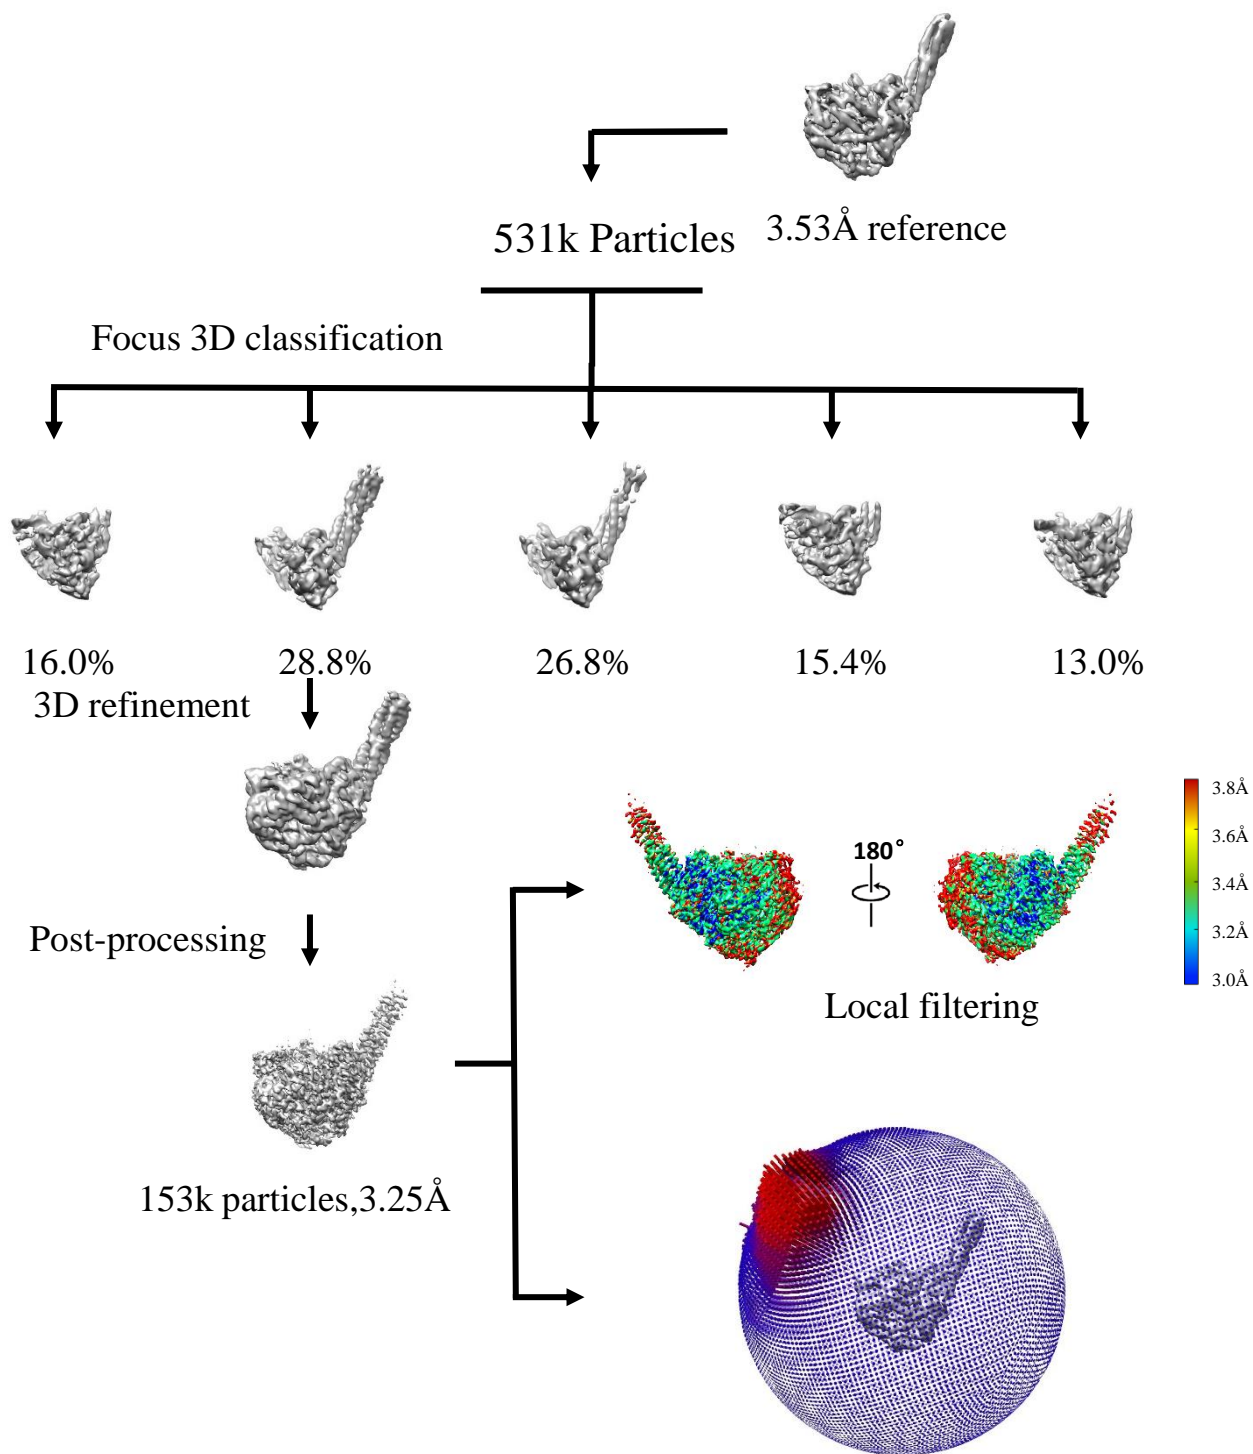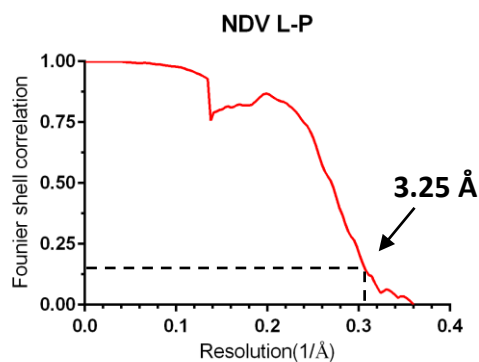

Angular distribution

d

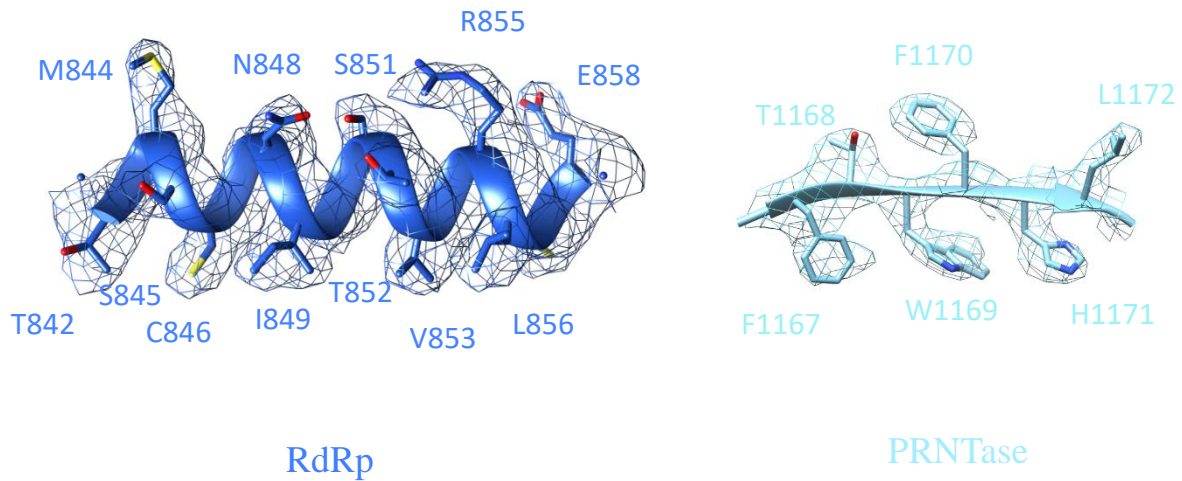

e

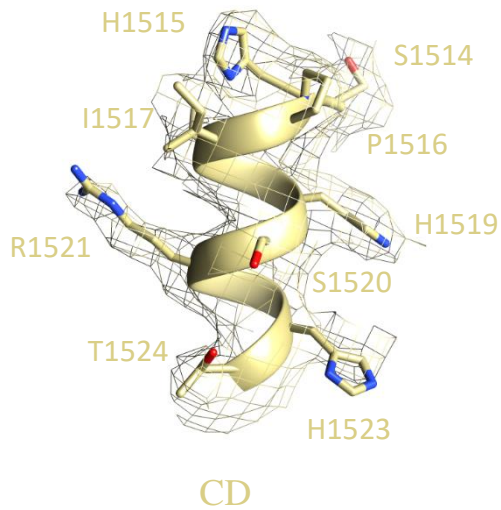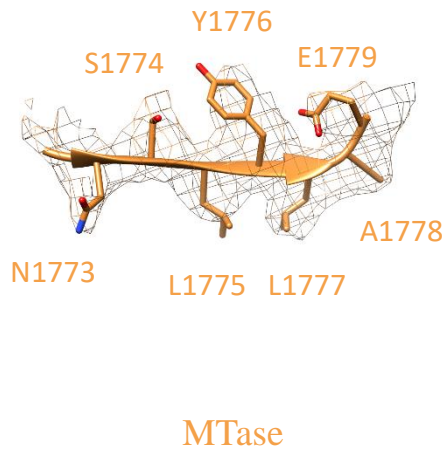

f

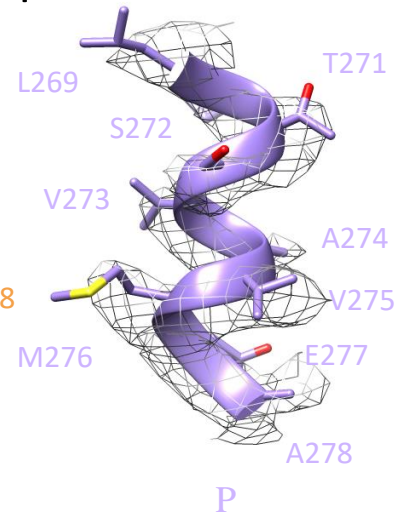

**Supplementary Figure 1: Cryo-EM analysis of the NDV L-P complex.** **a**, Brief 3D classification of NDV L<sub>c</sub>-P complex particles. We extracted approximate 2,589k particles, and after two rounds of 3D classification, obtained approximate 455k particles for further 3D reconstruction, with the final map reaching a resolution of 3.0Å. The initial map of NDV L<sub>f</sub>-P and L<sub>c</sub>-P<sub>e</sub> were 4.08 Å and 3.53 Å respectively. Local resolution and euler angle distribution of NDV L<sub>c</sub>-P reconstruction were demonstrated at the bottom. **b**, Brief 3D classification of NDV L<sub>f</sub>-P complex particles. We extracted approximate 47.3k particles, and after 3D classification, obtained approximate 42.5k particles for further 3D reconstruction, with the final map reaching a resolution of 3.41Å. Local resolution and euler angle distribution of NDV L<sub>f</sub>-P reconstruction were demonstrated at the bottom. **c**, Brief 3D classification of NDV L<sub>c</sub>-P<sub>e</sub> complex particles. We extracted approximate 531k particles, and after 3D classification, obtained approximate 153k particles for further 3D reconstruction, with the final map reaching a resolution of 3.25Å. Local resolution and euler angle distribution of NDV L<sub>c</sub>-P<sub>e</sub> reconstruction were demonstrated at the bottom. **a,b,c**, The FSC curves for each reconstruction. The FSC 0.143 cut-off values are indicated by black dashed lines. **d,e,f**, Representative density of three NDV L-P complexes reconstructions.

# RdRp

$\eta 1$   $\alpha 1$   
 $\eta 1$   $\alpha 1$   
 NDV 1 MAG.....SGSERA**EHQIILPE**.....SH**LSSPLV**KHK**L**LYY.WKLT**GL**  
 hMPV 1 ..M.....DPLNES**TVNVYLPD**.....SY**LKGVIS**.....F**SET**  
 VSV 1 MEVHDFETDEFNDFNEDDYA**TR**E**FLNPD**ERMTYLNHADYN**LNSPLI**SDD**I**DNLIRK**FN**S**L**  
 PIV5 1 .....MAG**SREIILPE**.....VH**LNSPIV**KHK**L**YYY.I**LLGN**L

$\eta 2$   $\alpha 2$   $\alpha 3$   $\beta 1$   
 NDV 39 **PL**PDECDFDH**LILSR**QWKKILESSTPDIERM**IKLGRS**V**HQTLS**.....HSSKLTGIL**HP**  
 hMPV 28 **NA**IGSCLLKR**PYLK**NDN.....TAK**VAIENP**V**IEHVR**.....  
 VSV 61 **PI**P.....SMWD**S**.....  
 PIV5 33 **PN**EIDLDD**LGPLHN**Q**NWNQ**IAHEES**NLAQRLVNV**R**NFL**ITH**I**PD**LRK**GH**WQ**EY**VNV**IL**WP**

$\alpha 4$   $\alpha 5$   
 NDV 93 RCLED**LVGLDIP**DSTNK**FR**IE**KKIQ**IHNTRYGE**PFTRL**CSYVEK.....**KL**L**G**  
 hMPV 60 .....**LK**.....NAVNS**KMKI**SDYK**VVEPV**N**MQ**HEI.MKNVH**S**CELT**LLKQF**L**T**  
 VSV 69 .....**KNW**DGV**LEMLT**SCQAN**PIS**T**S**.....**Q**.....**MHKW****MG**  
 PIV5 93 RILPLIPDFK**I**NDQ**LPLLK**N**WDK**L.....**VKE**SCSVINAGTS**Q**CIQ**NLS**YGL**TG**

$\alpha 6$   
 NDV 142 .....SS**W**TH..K**I**RRSE...E**F**D**S**L**R**T...D**P**AF**W**FHS.....**S**W**S**T**A**  
 hMPV 103 RSKNISTLKL**NMICD**W**LQ**LKSTSD**DSILS**FID**V**E**F**IP**S**V**S**N**W**F**S**.....**N**W**Y**N**L**  
 VSV 97 SWLMSDNHDASQ**GYS**F**LH**..E**V**D**K**.EAEIT**F**D**V**VE**T**...F**I**R**G**W**G**N**K**PIEY**I**KKER**W**T**D**S  
 PIV5 142 .....RG**N**L**F**T**R**S**R**E**L**SGDR...RD**I**D**L**K**T**...V**V**A**A**W**H**DS.....**D**W**K**R**I**

$\alpha 7$   $\beta 2$   $\beta 3$   
 NDV 173 KF**A**..**W**L**H**V**K**Q**I**Q...RH**L**I**V**AA.....R**T**R**S**AS..NK**L**V**T**L**S**HR**S**G**Q**V  
 hMPV 154 NK**L**..I..**L**E**F**RR...E**E**V**I**RTG.....S**I**L**C**R**S**L..G**K**L**V**F**I**V**S**S**Y**G**..**  
 VSV 151 FK**I**LA**Y**L**C**Q**K**F**L**D**L**H**K**L**T**I**L**NAVSEVELLN**L**ART**F**K**G**K**V**R**S**SHG**T**N**I**C**R**I**R**V**P**S**L**G**P**T  
 PIV5 177 S**D**E..**W**I**M**I**K**F**Q**M...R**Q**L**I**V**R**Q.....T**D**H**N**D**S**..D**L**I**T**Y**I**ENREG**I**I

$\beta 4$   $\beta 5$   $\alpha 8$   $\eta 3$   
 NDV 210 F**I**T**P**E**L**V**I**V**T**H**T**N**E**N**K**F**T**C**L**S**Q**E**L**V**L**M**Y**A**D**M**M**E**G**R**D**M**V**N**I**..**I**S**S**T**A**V**H**L.....  
 hMPV 188 .....**C**I**V**K**S**N**K**S**K**R**V**S**F**T**Y**N**Q**L**L**T**W**K**D**V**M**L**S**R**F**N**A**N**F**..**C**I**W**V**S**N**S**L**N**E**N**Q**E**G**L**G**L**R  
 VSV 211 F**I**SE**G**W**A**Y**F**..**K**K**L**D**I**L**M**D**R**N**F**L**M**V**K****D**V**I**C**R**M**Q**T**V**L**S**M**V**C**R**I**D**N**L**F**S**E.....  
 PIV5 214 I**I**T**P**E**L**V**A**L**F**N**T**E**N**H**T**L**T**Y**M**T**F**E**I**V**L**M**V**S**D**M**Y**E**G**R**H**N**I**L**S**..**L**C**T**V**S**T**Y**L.....

$\alpha 9$   $\eta 4$   $\alpha 10$   $\eta 5$  **TT**  
 NDV 258 .....RC**L**A**E**K**I**D**D**I**L**R**L**V**D**A**L**A**R**D**L**G**N**Q**V****Y**D**V**V**A**L**M**E**G**F**A**Y**G**A**V**Q**L**L**E**.P**S**G**T**F**A**G  
 hMPV 240 **S**N**L**Q**G**M**L**T**N**K**L**Y**E**T**V**D**Y**M**L**S**L**C**C**N.....**E**G**F**S**L**V**K**E**F**E**G**F**I**M**S**E**I**L**R**I**T**.E**H**A**Q**F**S**T  
 VSV 259 .....**Q**D**I**F**S**L**L**N**I**Y**R**I**G**D**K**I**V**ER**Q**G**N**F**S****Y**D**L**I**K**M**V**E**P**I**C**N**L**K**L**M**K**L**A**R**E**S**R**P**L**V**P**  
 PIV5 262 .....NP**L**K**K**R**I**T**Y**L**L**S**L**V**D**N**L**A**F**Q**I**G**D**A**V**Y**N**I**I**A**L**L**E**S**F**V**Y**A**Q**L**Q**M**S**D**.P**I**P**E**L**R**G**



$\alpha 26$   $\beta 10$   $\beta 11$   
 NDV 665 MGLPHFFEWIHLRLMDTTMFGVGDPFNPPSDPTDYDLTKVFNDDIYIVSARGGIEGLCQKL  
 hMPV 659 HGTQSLFCWLHLIVPMTTMCAYRHAPEETKGEYDIDKIEEQSGLYRYHMGGIEGWCQKL  
 VSV 629 LGYPSLIERTHEFFEKSLIYYNGRPDLMRV.HNNTLINSTSQRCVWCWQQQEGGLEGLRQKG  
 PIV5 687 YGYPHLFEWIIHLRLMRSTLYVGDPFNPPADTSQFDLTKVINNGDIFIVSPRGGIEGLCQKA

### GDN

$\alpha 27$   $\beta 12$   $\beta 13$   $\alpha 28$   
 NDV 725 WTMISIAAIQLAAARSHCRVACMVQGDNQVIAVTREVVRPDDSPESVLTQL...HEADSNF  
 hMPV 719 WTMEAIISLLDVVSVKTRCQMTSLLNGDNOQSIDVSKPKVVKLSEGLDEVKAD...YRLAVKM  
 VSV 688 WTILNLLVIQREAKIRNTAVKVLAQGDNOVICIQYKTKKSRNVVELQGALNQMVSNNEKI  
 PIV5 747 WTMISIAVIILSAATESGTRVMSMVQGDNOQIAVTRVPSLPTLEKKTIA...FRSCNLF

$\beta 14$   $\beta 15$   $\beta 16$   $\beta 17$   $\alpha 29$   
 NDV 782 FRELIHVNHILIGHNPKDRERTIRSDTFFIYSKRIFKDGAILLSQVLEKNSSKLVLVSGDLSL  
 hMPV 775 LKEIRDAYRNIGHKLLKEGETYISRDLDQFISKVVIQSEGVMHPTPIKQVLRVGPWINTILDD  
 VSV 748 MTAIKIGTGKLGLLINDDETMOQSADYLNYGKIPFRGVIRGLETKRWSSRVTCVTNDQIP  
 PIV5 804 FERLKCNNFGLGHHLKEQETIISSHFFVYSKRIFYQGRILTQALKNASKLCLTADVLGE

$\alpha 30$   $\alpha 31$   
 NDV 841 .....NTVMSCANISSTVARLCEGLPKDFCYLNYLMSCIQTYFD..SEFSITST..  
 hMPV 835 IKTSAESIGSLCQELFRGESIIIVSLILRNFWLNYLYMHESKQHPLAGKQLFKQLNKTTLT  
 VSV 807 ...TCANIMSSVSTNALTVAHFAENPINAMIQY..NYFGTFARLLM..MHDPALRQSLY  
 PIV5 863 .....CTQSSCSNLATVMRLTENGVEKIDICFYLNIMYTIKQLSYD..IIFPQVSIIP..

### PRNTase

$\alpha 32$   $\eta 11$   $\eta 12$   $\alpha 33$   
 NDV 891 QSGSNQSWINDIPFTHSYVLTPAQLGGLSNLQYSRSLYTRNIQDPTTAFAEVKRLEAVGL  
 hMPV 895 SVQRFPEIKRENEVDLWMNIPMFGGGDPVVFYRSFYRRTPDFLTEAISHVDILKLIISA  
 VSV 860 EVQDKIPGLHSSTFKYAMLYLDPISIGGVSGMSLSRFLIRAFBDPVTELSFWRFIH.VHA  
 PIV5 913 GDQITLEYLNNPHLVSRLLALPSQLGGLNLYLSCSRLENRNIQDPVVS AVADLKRLLIKSGC

$\alpha 34$   $\alpha 35$   $\alpha 36$   
 NDV 951 LGPN....IMT.NILTRPFGNGDWA.SL.CN.DPY.SFN.FESV.ASP.SIVLKKHTQRV.LFE.TC.  
 hMPV 955 NIKNETKVSFFKALLSIEKNERATLT.TLMRDPQAVGSEKQAKV.TSDINR.TAVTS.ILSLS.  
 VSV 919 RSEHLKEMS.AV.FGNPEIAKFRITHID.KL.VED.PT.SLN.IAMGMS.PANLLKTEVKKCLIESRQ  
 PIV5 973 MDYW....ILY.NL.LGR.KPFGNSWA.TLAAD.PY.SIN.IE.YQY.P.P.TALKRHTQQA.LME.LS.

$\beta 18$   $\beta 19$   $\alpha 37$   $\alpha 38$   $\alpha 39$   
 NDV 1004 ..SNP.LL.SGVH..TEDNEAEEKALAEYLLNQEV.IHPRV.AHA.I.ME.A.S.SVGR.RKQ.I.QG.LV.D.T  
 hMPV 1014 ..PNQLFSDSAIHYSRNEE.VGI.IAE...NITP.VY.PHG.LRVLY.E.SL.P.FHK.AEK.V.VN.M.I.S.G  
 VSV 979 TIRNQ.VIKDA.TI...YLYHEE.DR.LRS.FLWS.INP.LF.PRF.LSE.FKSGT.F.LGV.ADGL.I.S.LF.Q.N  
 PIV5 1026 ..TNP.ML.RG.IF..SDNAQA.EENN.LAR.FLLDREV.IFPRV.AHI.I.IEQ.T.S.VGR.RKQ.I.QG.YL.D.S



$\alpha 40$                        $\alpha 41$                        $\alpha 42$   
 . . . . .  
 NDV 1060 T N T V I K I A L S R K P L G I K R L A R I I N Y S S M H A M L F R R D V F L S . . . . . N R A N . . . . . H P L V S  
 hMPV 1069 T K S I T N L L Q R T S A I N G E D I D R A V S . . . . . M M L E N L G L L S R I L S V V V D S I E I P I K . . . S N  
 VSV 1036 S R T I R N S F K K K . . . Y H R E L D D L I V R S E . . . . . V S S L T . . . . . H L G K L H L R R G S C K  
 PIV5 1082 T R S I M R K S L E I K P L S N R K L N E I L D Y N I N Y L A . Y . N L A L L K . . . . . N A I E P P T Y L K A M T

T T                       $\alpha 43$                        $\alpha 44$                        $\beta 18$                        $\eta 13$   
 . . . . .  
 NDV 1109 S D M C S L A L A D Y A R N R S W S P L T G G R K I L G V S N P D T I E L V E G E I L S I S G G C S K C D S G D E Q F T  
 hMPV 1120 G R L I C C Q I S R T L R E T S W N N M . . . . . E I V G V T S P S I T T C M D V . I Y A T S S . . . . . H L K  
 VSV 1078 M W T C S A T H A D T L R Y K S W G . . . . . R T V I G T T V P H P L E M L G P . Q H R K E T P C A P C N T S G F N Y V  
 PIV5 1133 L E T C S I D I A R N L R K L S W A P L L G G R N L E G L E T P D P I E I T A G A L I V G S G Y C E Q C A A G D N R F T

### GxxT

$\beta 19$                        $\beta 20$                       T T                       $\alpha 45$   
 . . . . .  
 NDV 1169 W F H L P S N I E L T D D T S K N P F M R V P Y L G S K T Q E R R A A S L A . K I A H M S P H V K A A L R A S S V L I W  
 hMPV 1165 . G I I I E K F S T D R T T R G Q R G P K S P W V G S S T Q E K K L V P V Y . N R Q I L S K Q Q R E Q L E A I G K M R W  
 VSV 1132 S V H C P D G I H D V . . . F S S R G P L P A Y L G S K T S E S T S I L Q P W E R E S K V P L I K R A T R L R D A I S W  
 PIV5 1193 W F F L P S G I E I G G D P R D N P E I R V P Y I G S R T D E R R V A S M A . Y I R G A S S S L K A V L R L A G V Y I W

### HR

$\alpha 46$                        $\alpha 47$   
 . . . . .  
 NDV 1228 A Y G D N D I N W T A A L K L A R S R C N I S S E Y L R L L S P L P T A G N L Q H R L D D G I T Q M . T F T P A S . L Y  
 hMPV 1223 V Y K G T P G L R R L L N K I C L G S L G I S Y K C V K P L L P R F M S V N F L H R L S V S S R P M . E F P A S V P A Y  
 VSV 1189 F V E P D S K L A M T I L S N I H S L T G E . . E W T K R Q H G F K R T G S A L H R F S T S R M S H G G F A S Q S T A .  
 PIV5 1252 A F G D T L E N W I D A L D L S H T R V N I T L E Q L S L T P L P T S A N L T H R L D D G T T L L . K F T P A S . S Y

$\eta 14$                        $\beta 21$                       T T                       $\alpha 48$                       T T                       $\beta 22$                        $\beta 23$   
 . . . . .  
 NDV 1286 R V S P Y V H . I S N D S Q R L F T E E G V K E G N V V Y Q Q I M L L G L S L I E S L F P M T V I K T Y D E I T L H L H  
 hMPV 1282 R T T N Y H F D T S P I N Q A L S E R F G N E D I N L V F Q N A I S C G I S I M S V V E Q L T G R S P K Q . L V L I P Q  
 VSV 1246 A L T R L M A . . . . . T T D T M R D L G D Q N F D F L F O A T L L Y A Q I T T T V A . . . . . R D G W I T S C T D H Y H  
 PIV5 1310 T F S S F T H . I S N D E Q Y L T I N D K T A D S N I I Y Q Q L M I T G L G I L E T W N N P P I N R T F E E S T L H L H

### CD

T T                       $\alpha 49$                        $\eta 15$                       T  
 . . . . .  
 NDV 1345 S K F S C C I R E A P V A V P F E L T G V A P D L R V V A S N K F M Y D P N P V A E G D F A R I D L A I F K S Y E L N L  
 hMPV 1341 . L E E I D I M P P P V F Q . . G K F . N Y K L V D K I T S D Q H I F S P D K I D M L T L G K M L M P T I K G Q K T . .  
 VSV 1297 I A C K S C L R P I E E I T L D S S M D Y T P P . . . . . D V S H V L K T W R N G E G S W G Q E I K Q I Y . P L E G N W  
 PIV5 1369 T G A S C C V R P V D S C I L S E A L T V K P H I T V P Y S N K F V F D E D P L S E Y E T A K L E S L S F Q A Q L G N I

$\alpha 50$   
 T                      . . . . .  
 NDV 1405 E S Y S T V E L M N I . L S I S S G K L I G Q S V . . . . . V S Y D E E T S I K N D A I I V Y D N T R N W I S E A  
 hMPV 1395 . . . . . D Q F L N K R E N Y F H G N N L I E S L S A A L A C H W C G I L T E Q C I . E N N I F K K D W G D G F I S D H  
 VSV 1351 K N L . . . . . A P A E Q S Y Q V G R C I G F L Y . G D L A Y R K S T H A E D S S L F P L S I Q G R I R G R G F L K G L  
 PIV5 1429 D A V D M T G K L T L . L S Q F T A R Q I N A I . . . . . T G L D E S V S L T N D A I V A S D Y V S N W I S E C







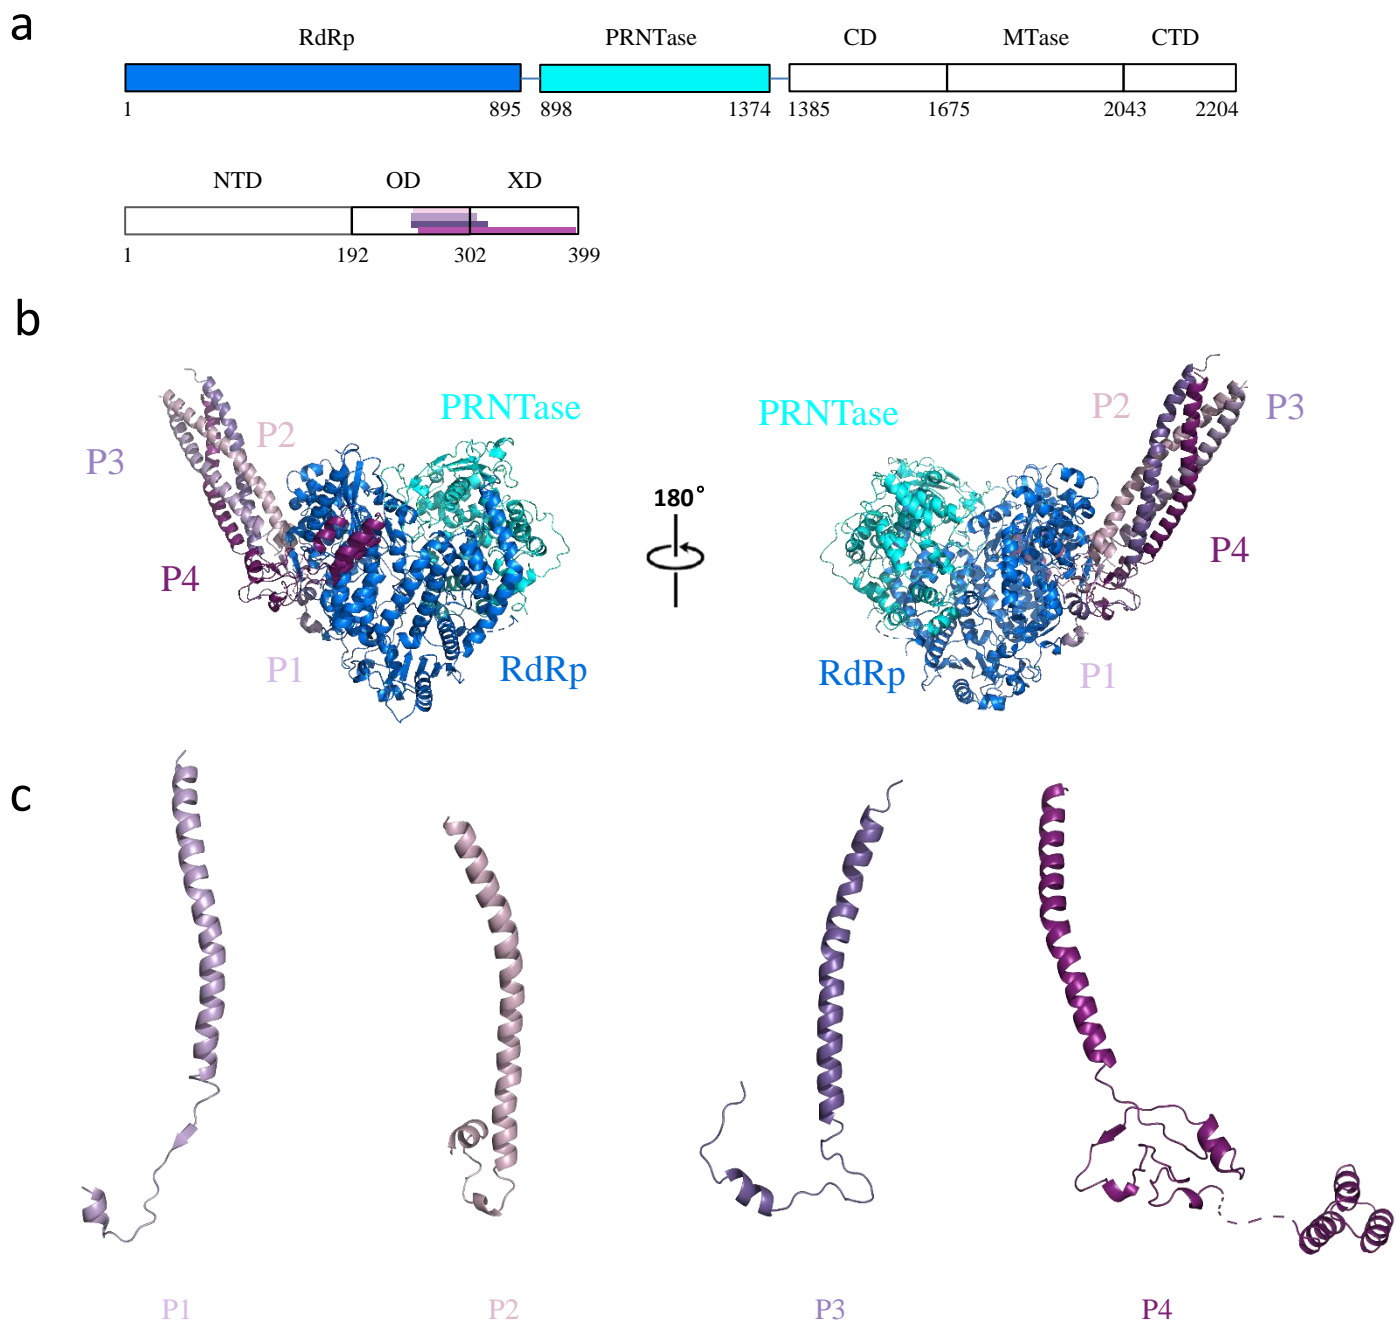

**Supplementary Figure 3: Overall structure of NDV  $L_c$ - $P_e$  complex.** **a**, Schematic diagram of the domain architecture of NDV L protein divided into five parts: RdRp, PRNTase, CD, MTase and CTD. NDV P protein is divided into three parts: NTD, OD and XD. RdRp and PRNTase domains of NDV L is represented by blue and cyan; P protein monomers is represented using unique colors. **b**, Cartoon representation of NDV  $L_c$ - $P_e$  complex. The structures are colored by domains, the coloring scheme is identical to that in (a). The unresolved linker regions are connected by dashed lines. The right region is rotated 180° along the vertical axis. **c**, Structures adopted by the four individual P subunits bound to L.

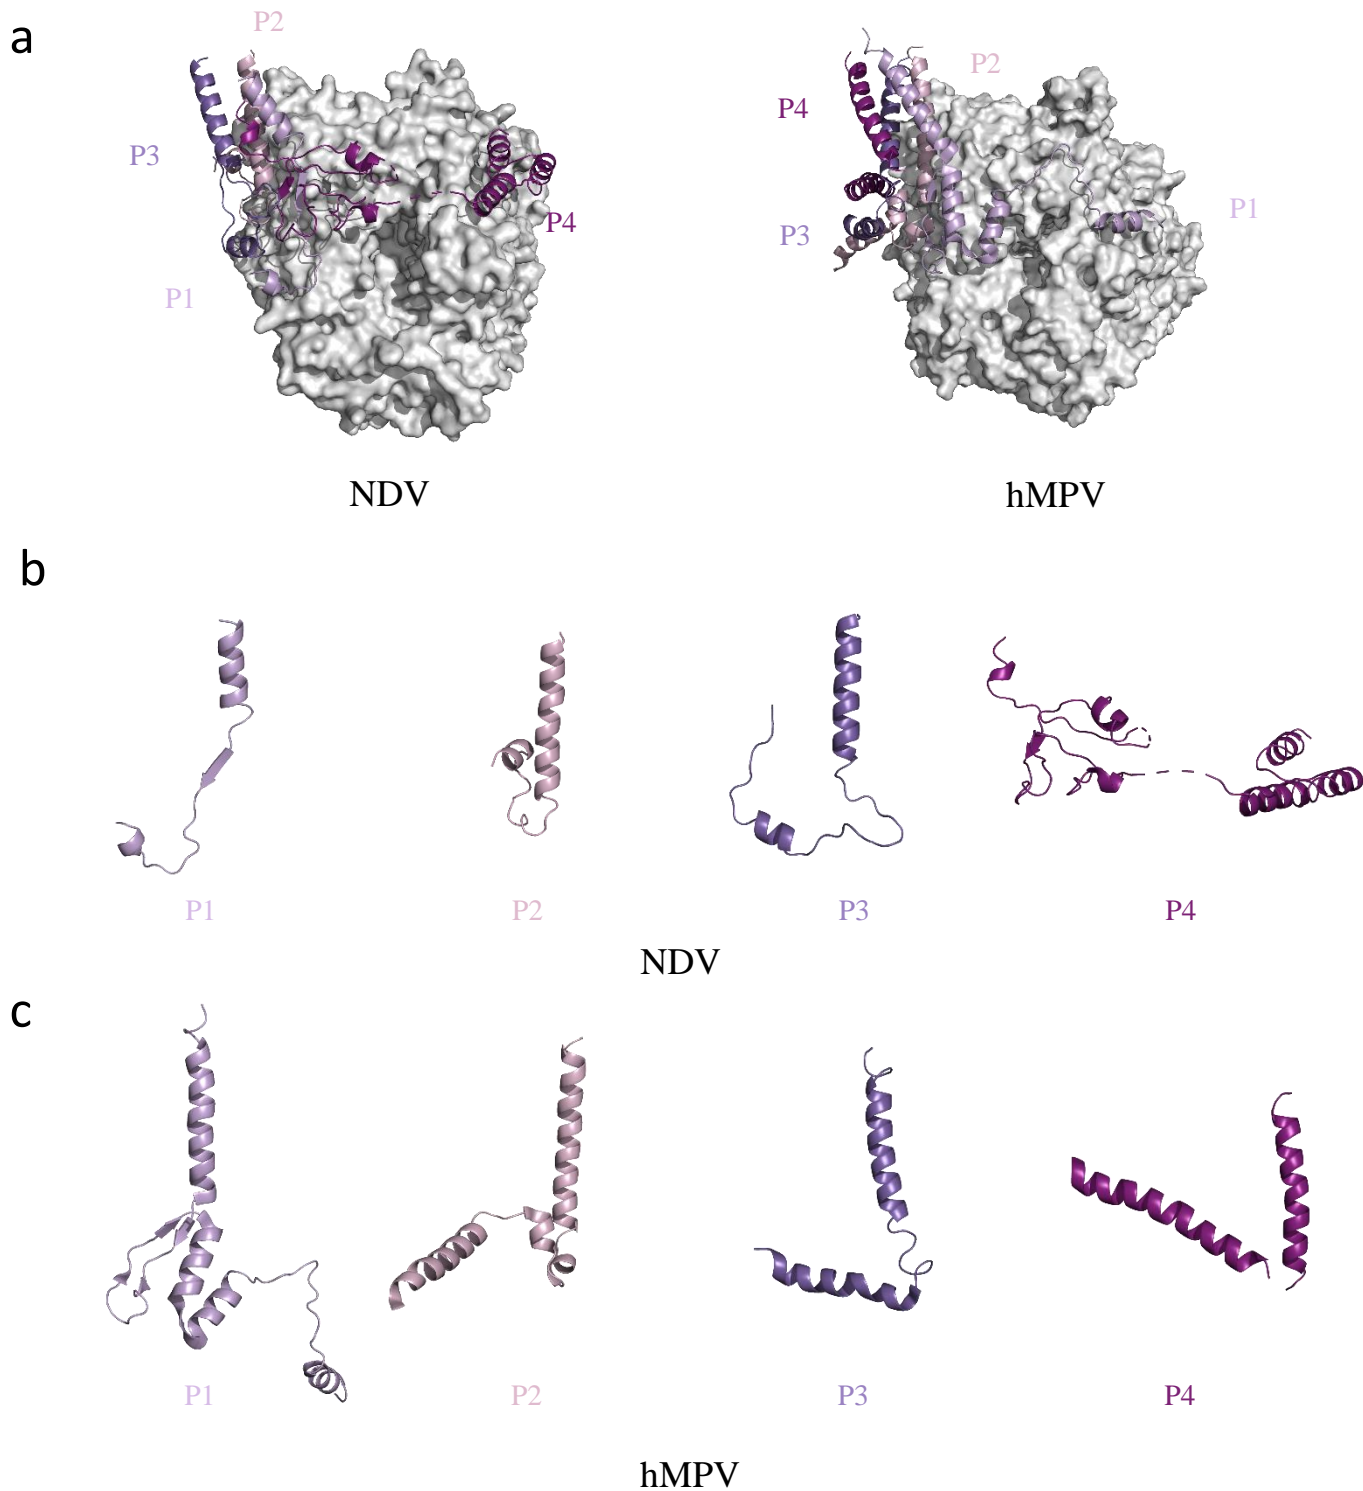

**Supplementary Figure 4: P protein tetramer in complex with L.** **a**, NDV (left) and hMPV (right) L proteins are shown as a gray molecular surface, and P protein monomers are shown in cartoon. Each P protein is represented using a unique color. **b,c**, Structures adopted by the four individual P protein subunits bound to L, in complex structures of NDV (**b**) and hMPV (**c**).

**a**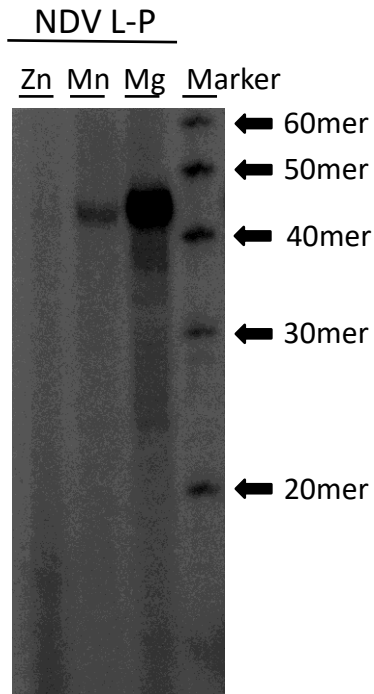**b**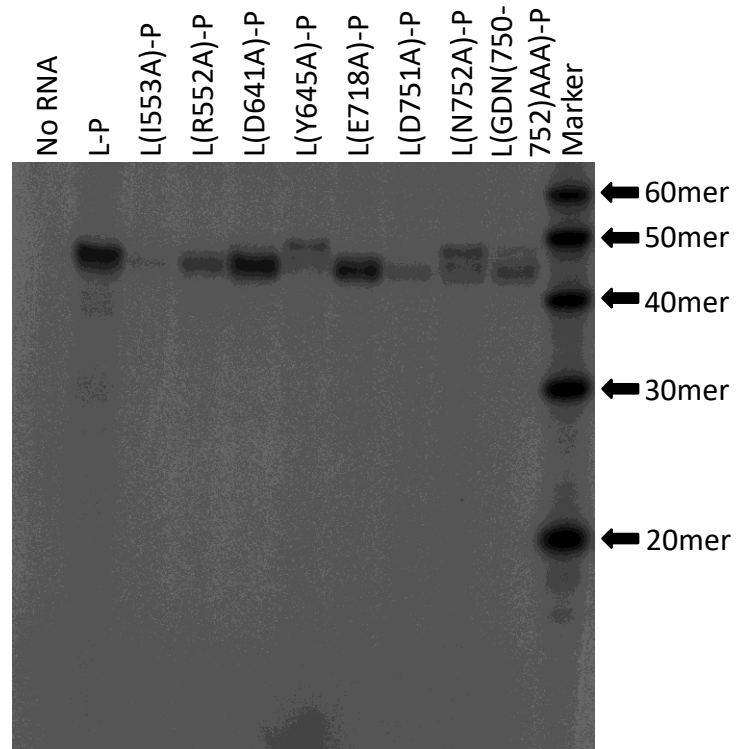**c**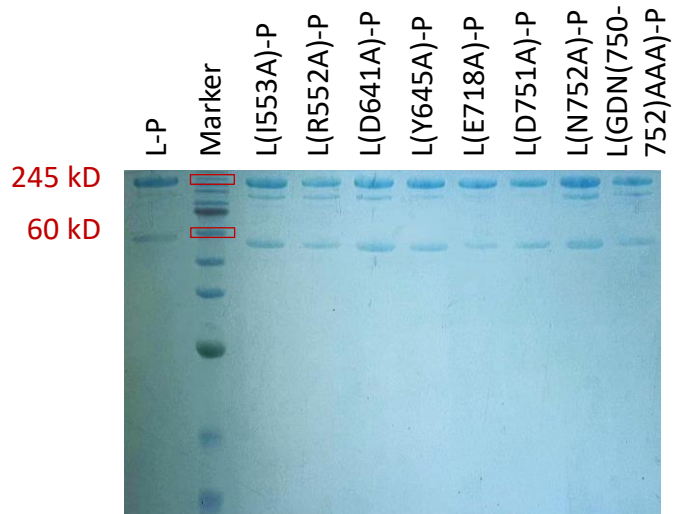

**Supplementary Figure 5: *In vitro* functional assays for NDV L-P complex.** **a**, Show the effect of metal ions on enzymatic activity, where  $Mg^{2+}$  and  $Mn^{2+}$  promote RNA replication activity, while  $Zn^{2+}$  suppresses the activity of L protein. Final concentration for  $Mg^{2+}$ ,  $Mn^{2+}$  and  $Zn^{2+}$  were 5 mM in the assay. **b**, The RNA synthesis reactions show the purified native L-P complex and its mutants' activity. **c**, SDS-PAGE was performed to assess the quality of L-P complex mutants. Source data are provided as a Source Data file. Sample preparation-related experiments including protein purification and enzymatic assays were reproduced at least twice independently.

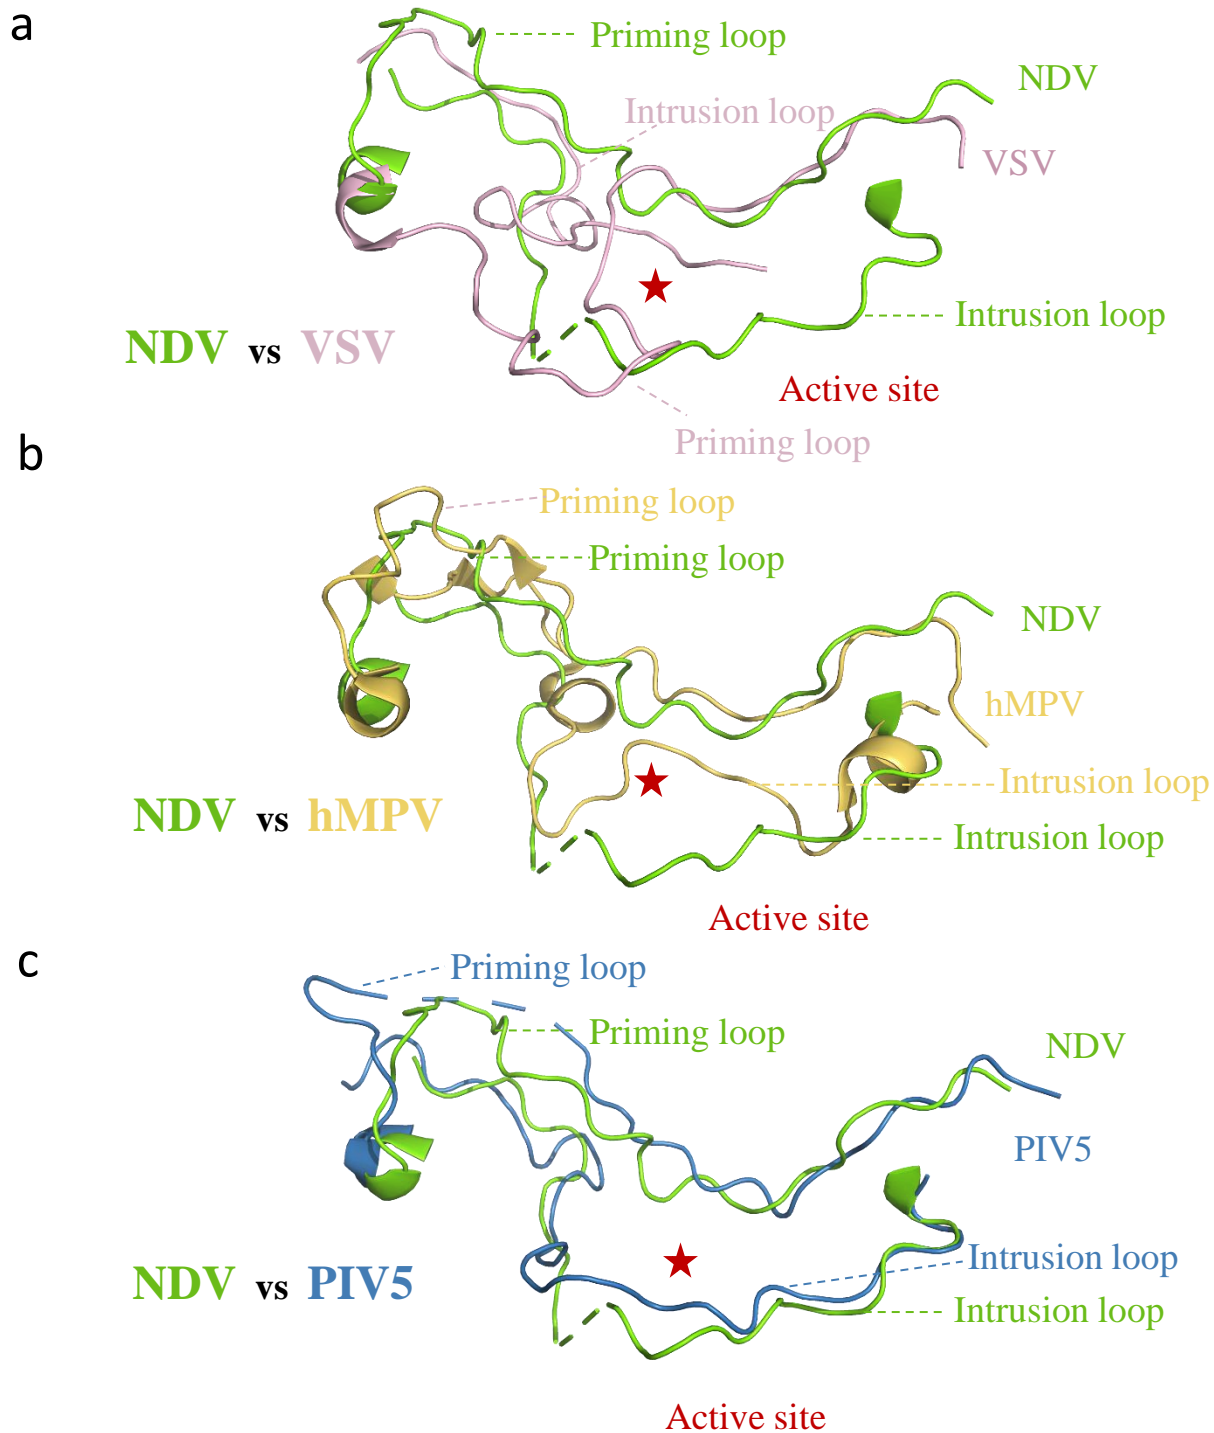

**Supplementary Fig 6: Comparison of NDV priming loop and intrusion loop with related viruses. a,b,c,** The comparison of NDV priming loop and intrusion loop with VSV (a), hMPV (b) and PIV5 (c) respectively. The catalytic site is indicated by a red star.



a VSV

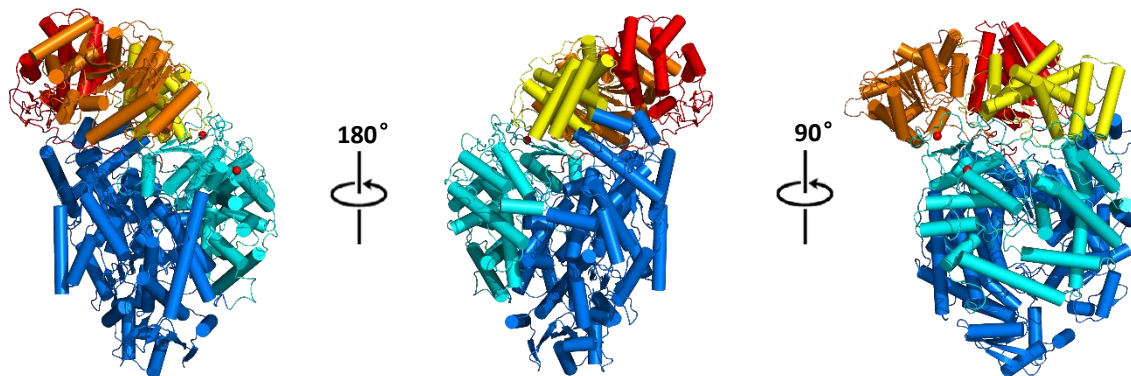

b NDV

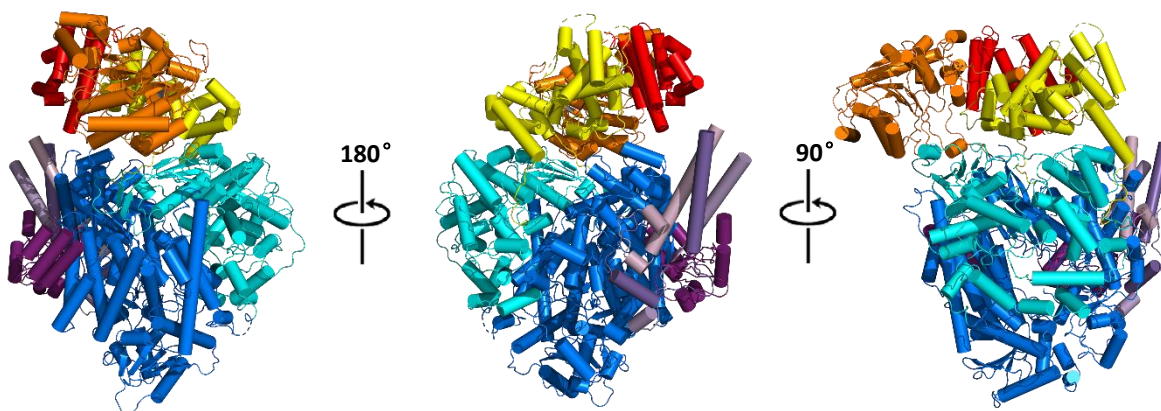

c PIV5

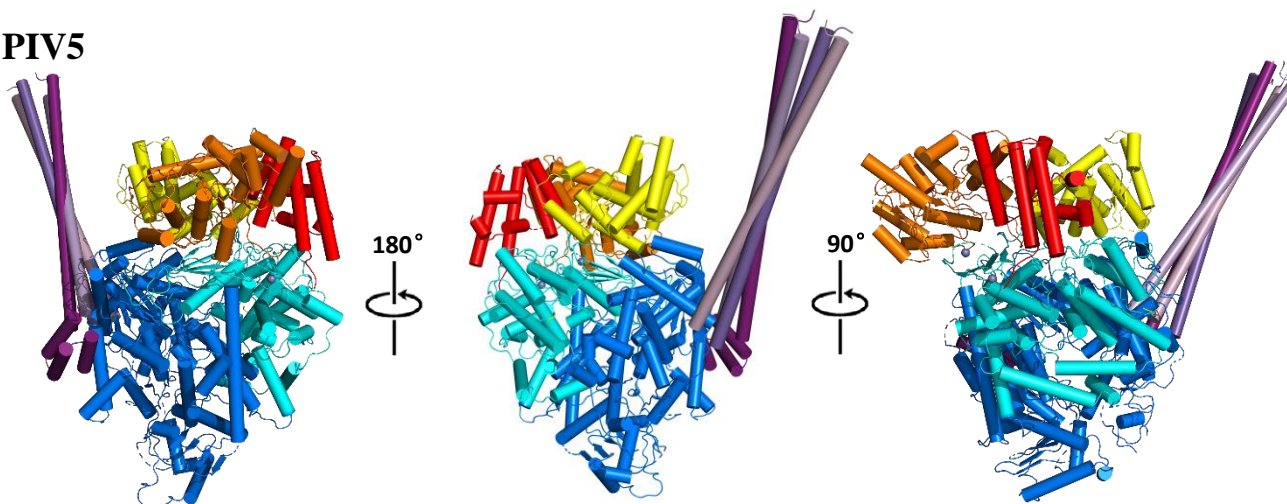

**Supplementary Figure 7: C-terminal conformations in the structures of nsNSV L-P complex.** a,b,c, L-P complex structures of VSV (a), NDV (b) and PIV5 (c) are shown in cartoon and colored by domains, with  $\alpha$ -helix shown as cylinders. Structures representation in each panel are shown in the same orientation after superimposing RdRp domain and PRNTase domain.

**Supplementary Table 1: Statistics of Data Collection, Image Processing and Model Building.**

| <b>Data collection</b>                             |                        |                        |                                    |
|----------------------------------------------------|------------------------|------------------------|------------------------------------|
|                                                    | <b>L<sub>c</sub>-P</b> | <b>L<sub>r</sub>-P</b> | <b>L<sub>c</sub>-P<sub>e</sub></b> |
| <b>EM equipment</b>                                | FEI Titan Krios        | FEI Titan Krios        | FEI Titan Krios                    |
| <b>Voltage (kV)</b>                                | 300                    | 300                    | 300                                |
| <b>Detector</b>                                    | Gatan K2               | Gatan K2               | Gatan K2                           |
| <b>Pixel size (Å/pixel)</b>                        | 1.04                   | 1.04                   | 1.04                               |
| <b>Electron dose (e<sup>-</sup>/Å<sup>2</sup>)</b> | 60                     | 60                     | 60                                 |
| <b>Defocus range (µm)</b>                          | -1.2-2.5               | -1.2-2.5               | -1.2-2.5                           |
| <b>Reconstruction</b>                              |                        |                        |                                    |
| <b>Software</b>                                    | Relion3.0              | Relion3.0              | Relion3.0                          |
| <b>Number of used particles</b>                    | 455k                   | 42.5k                  | 153k                               |
| <b>Symmetry</b>                                    | C1                     | C1                     | C1                                 |
| <b>Map sharpening B-factor (Å<sup>2</sup>)</b>     | -134.7                 | -70                    | -120.6                             |
| <b>Final resolution (Å)</b>                        | 3.0                    | 3.41                   | 3.25                               |
| <b>Model building</b>                              |                        |                        |                                    |
| <b>Software</b>                                    | Coot                   | Coot                   | Coot                               |
| <b>Model Refinement</b>                            |                        |                        |                                    |
| <b>Software</b>                                    | PHENIX                 | PHENIX                 | PHENIX                             |
| <b>Map CC (mask)</b>                               | 0.815                  | 0.816                  | 0.745                              |
| <b>Map CC (peaks)</b>                              | 0.615                  | 0.697                  | 0.640                              |
| <b>Map CC (volume)</b>                             | 0.777                  | 0.809                  | 0.731                              |
| <b>Rmsd (bonds) (Å)</b>                            | 0.0092                 | 0.0087                 | 0.0114                             |
| <b>Rmsd (angles) (°)</b>                           | 1.33                   | 1.27                   | 1.41                               |
| <b>Model composition</b>                           |                        |                        |                                    |
| <b>L Protein residues</b>                          | 1309                   | 2059                   | 1310                               |
| <b>P Protein residues</b>                          | 242                    | 262                    | 373                                |
| <b>Validation</b>                                  |                        |                        |                                    |
| <b>MolProbity score</b>                            | 1.52                   | 1.72                   | 1.87                               |
| <b>Clash score</b>                                 | 4.58                   | 5.17                   | 6.46                               |
| <b>Ramachandran plot</b>                           |                        |                        |                                    |
| <b>Outliers (%)</b>                                | 0                      | 0                      | 0                                  |
| <b>Allowed (%)</b>                                 | 4.2                    | 6.94                   | 7.67                               |
| <b>Favored (%)</b>                                 | 95.8                   | 93.06                  | 92.33                              |
| <b>Rotamer outliers (%)</b>                        | 0.66                   | 0.34                   | 1.14                               |
| <b>Cβ outliers (%)</b>                             | 0                      | 0                      | 0                                  |

**Supplementary Table 2: Summary of the model.**

| <b>Subunit Name</b>                        | <b>Chain</b> | <b>Total residues/<br/>range built</b>                                                                                                                                                            | <b>Unmodelled residues</b>                                                                                                                                                                                   | <b>% atomic<br/>model</b> |
|--------------------------------------------|--------------|---------------------------------------------------------------------------------------------------------------------------------------------------------------------------------------------------|--------------------------------------------------------------------------------------------------------------------------------------------------------------------------------------------------------------|---------------------------|
| <b>L<sub>c</sub>-P complex</b>             |              |                                                                                                                                                                                                   |                                                                                                                                                                                                              |                           |
| L                                          | A            | 2204/8-544, 553-583, 588-611, 629-887,<br>894-1194, 1209-1265, 1278-1302, 1310-<br>1384                                                                                                           | 1-7, 545-552, 584-587, 612-<br>628, 888-893, 1195-1208,<br>1266-1277, 1303-1309,<br>1385-2204                                                                                                                | 1309/2204                 |
| P1                                         | B            | 399/268-301                                                                                                                                                                                       | 1-267, 302-399                                                                                                                                                                                               | 34/399                    |
| P2                                         | C            | 399/264-305                                                                                                                                                                                       | 1-263, 306-399                                                                                                                                                                                               | 42/399                    |
| P3                                         | D            | 399/262-312,                                                                                                                                                                                      | 1-261, 313-399                                                                                                                                                                                               | 51/399                    |
| P4                                         | E            | 399/274-289, 294-342, 350-399                                                                                                                                                                     | 1-273, 290-293, 343-349                                                                                                                                                                                      | 115/399                   |
| <b>L<sub>r</sub>-P complex</b>             |              |                                                                                                                                                                                                   |                                                                                                                                                                                                              |                           |
| L                                          | A            | 2204/8-544, 553-583, 587-610, 629-889,<br>894-1268, 1277-1304, 1310-1431, 1442-<br>1458, 1461-1573, 1579-1597, 1601-1625,<br>1634-1641, 1645-1676, 1696-1718, 1737-<br>2048, 2053-2076, 2094-2201 | 1-7, 545-552, 584-586, 611-<br>628, 890-893, 1269-1276,<br>1305-1309, 1432-1441,<br>1459-1460, 1574-1578,<br>1598-1600, 1626-1633,<br>1642-1644, 1677-1685,<br>1719-1736, 2049-2052,<br>2077-2093, 2202-2204 | 2059/2204                 |
| P1                                         | B            | 399/261-301                                                                                                                                                                                       | 1-260, 302-399                                                                                                                                                                                               | 41/399                    |
| P2                                         | C            | 399/259-305                                                                                                                                                                                       | 1-258, 306-399                                                                                                                                                                                               | 47/399                    |
| P3                                         | D            | 399/259-312                                                                                                                                                                                       | 1-258, 313-399                                                                                                                                                                                               | 54/399                    |
| P4                                         | E            | 399/274-343, 350-399                                                                                                                                                                              | 1-273, 344-349                                                                                                                                                                                               | 120/399                   |
| <b>L<sub>c</sub>-P<sub>e</sub> complex</b> |              |                                                                                                                                                                                                   |                                                                                                                                                                                                              |                           |
| L                                          | A            | 2204/8-544, 553-583, 588-611, 629-888,<br>894-1194, 1209-1265, 1278-1302, 1310-<br>1384                                                                                                           | 1-7, 545-552, 584-587, 612-<br>628, 889-893, 1195-1208,<br>1266-1277, 1303-1309,<br>1385-2204                                                                                                                | 1310/2204                 |
| P1                                         | B            | 399/234-301                                                                                                                                                                                       | 1-233, 302-399                                                                                                                                                                                               | 68/399                    |
| P2                                         | C            | 399/236-306                                                                                                                                                                                       | 1-235, 307-399                                                                                                                                                                                               | 71/399                    |
| P3                                         | D            | 399/236-311                                                                                                                                                                                       | 1-235, 312-399                                                                                                                                                                                               | 76/399                    |
| P4                                         | E            | 399/236-343, 350-399                                                                                                                                                                              | 1-235, 344-349                                                                                                                                                                                               | 158/399                   |

**Supplementary Table 3: RNA oligonucleotides used for *in vitro* functional assays**

---

| vRNA    |                                                                         |
|---------|-------------------------------------------------------------------------|
| 3'-10nt | 5'-UCUGUUUGGU-3'                                                        |
| 3'-20nt | 5'-UCACAGAAUCUCUGUUUGGU-3'                                              |
| 3'-30nt | 5'-GUAUCGUACCUCACAGAAUCUCUGUUUGGU-3'                                    |
| 3'-40nt | 5'-CCAUCGCCUUGUAUCGUACCUCACAGAAUCUCUGUUUGGU-3'                          |
| 3'-50nt | 5'-UUCGAUUGCUCUCAUCGCCUUGUAUCGUACCUCACAGAAUCUC<br>UGUUUGGU-3'           |
| 3'-60nt | 5'-CCCGUGCGAUUUCGAUUGCUCUCAUCGCCUUGUAUCGUACCUC<br>ACAGAAUCUCUGUUUGGU-3' |

---

| cRNA    |                                                             |
|---------|-------------------------------------------------------------|
| 3'-30nt | 5'-AUUCUGAUAUUCACCAAUCUUUGUUUGGU-3'                         |
| 3'-40nt | 5'-UUGUCACAUUAUUCUGAUAUUCACCAAUCUUUGUUUGGU-3'               |
| 3'-50nt | 5'-ACAGAAUAGCUUGUCACAUUAUUCUGAUAUUCACCAAUCUU<br>UGUUUGGU-3' |

---
